# Supplementary material for: Preparation and Application of Fluorine-Free Finishing Agent with Excellent Water Repellency for Cotton Fabric
Source: MDPI journal article supplement (doi:10.3390/polym13172980), 2021-09-02
Supplement: s1 [file s1]

## Supplementary Materials

### Supplementary figure captions:

**Figure S1.** The influence of dosage of APDES on ammonia value of CAHPS.

**Figure S2.** The effect of dosage of HDTMS on WCA of cotton fabric.

**Figure S3.** The particle size distribution of silica and GPTMS-SiO<sub>2</sub>.

**Figure S4.** The effect of 20 nm (a), 100 nm (b) and 1  $\mu$ m (c) silica on WCA of cotton fabric.

**Figure S5.** FT-IR spectra of CAHPS, GPTMS-SiO<sub>2</sub> and rSiO<sub>2</sub>-CAHPS.

**Figure S6.** TGA curves of CAHPS and rSiO<sub>2</sub>-CAHPS.

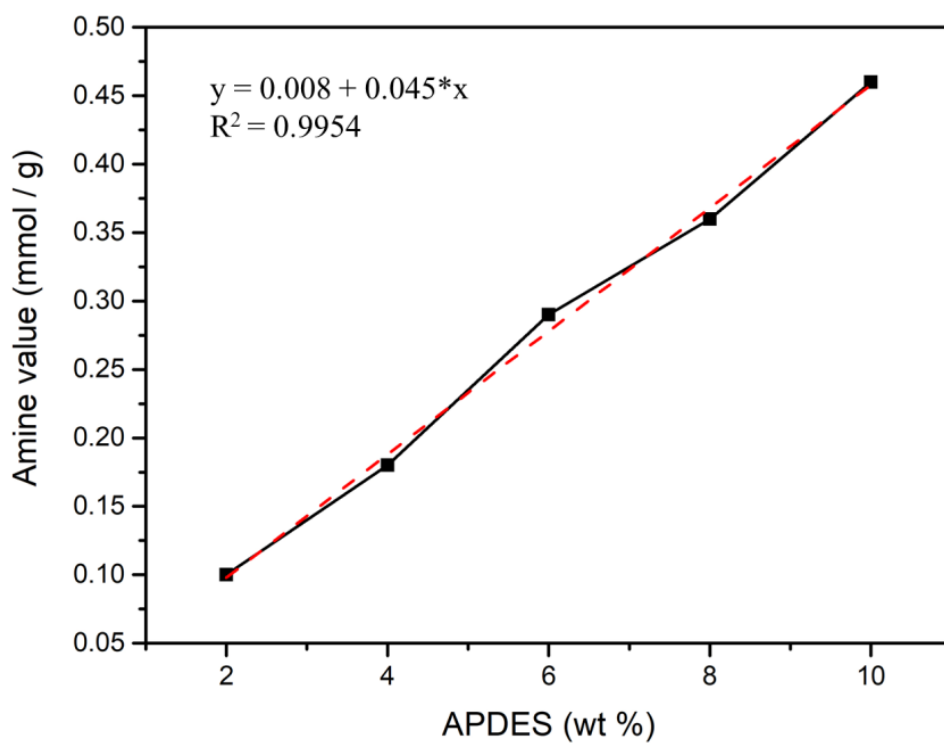

**Figure S1.** The influence of dosage of APDES on ammonia value of CAHPS.

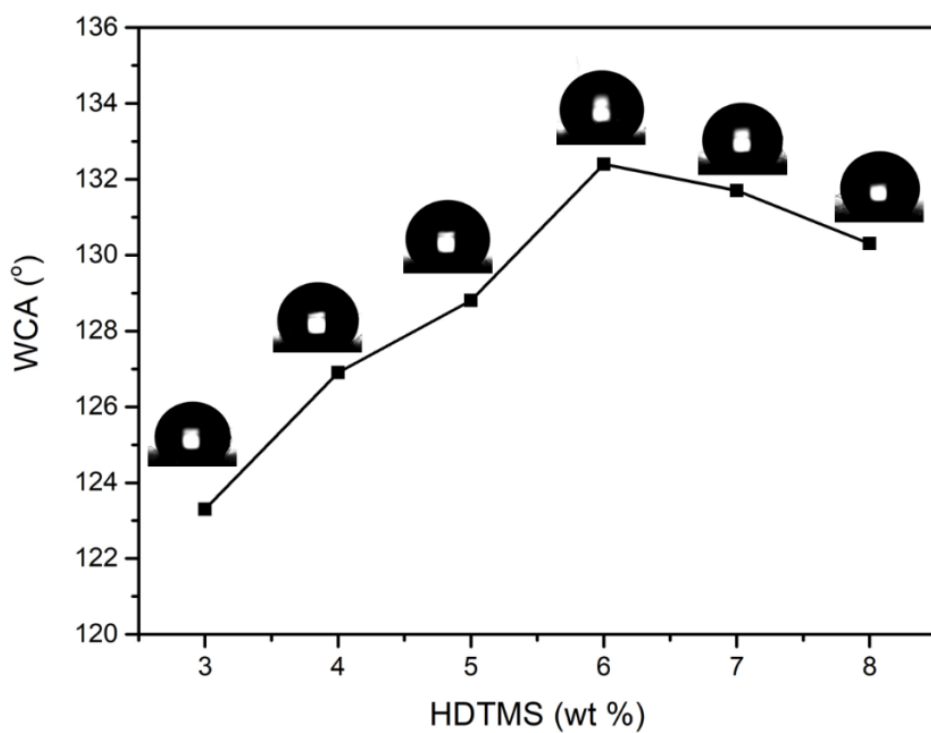

**Figure S2.** The effect of dosage of HDTMS on WCA of cotton fabric.

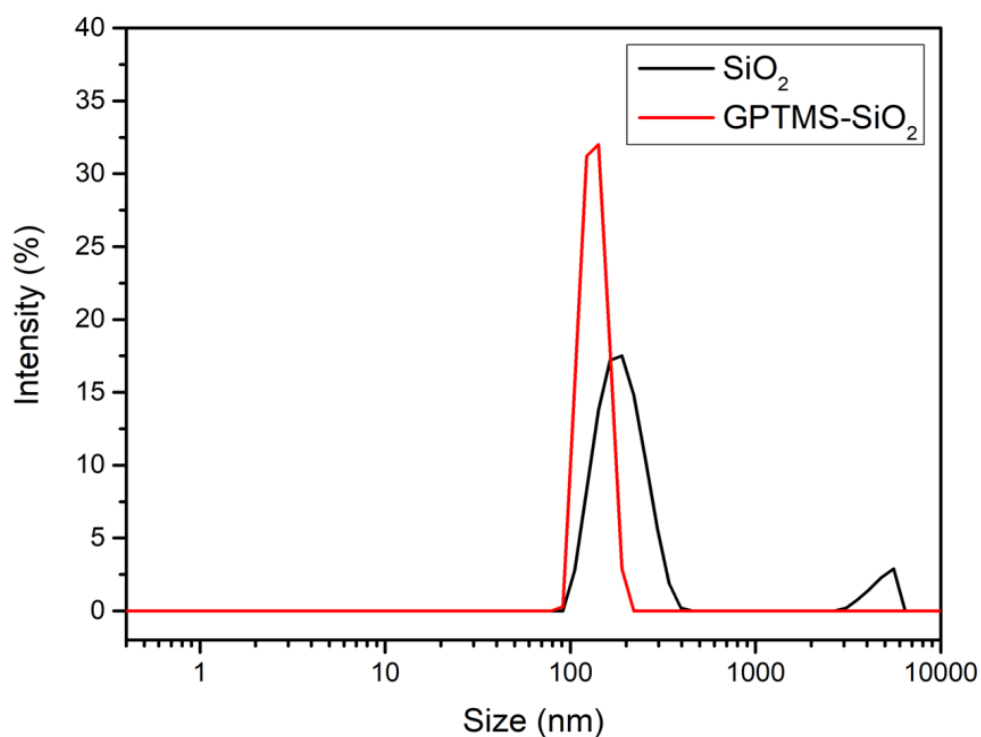

**Figure S3.** The particle size distribution of silica and GPTMS-SiO<sub>2</sub>.

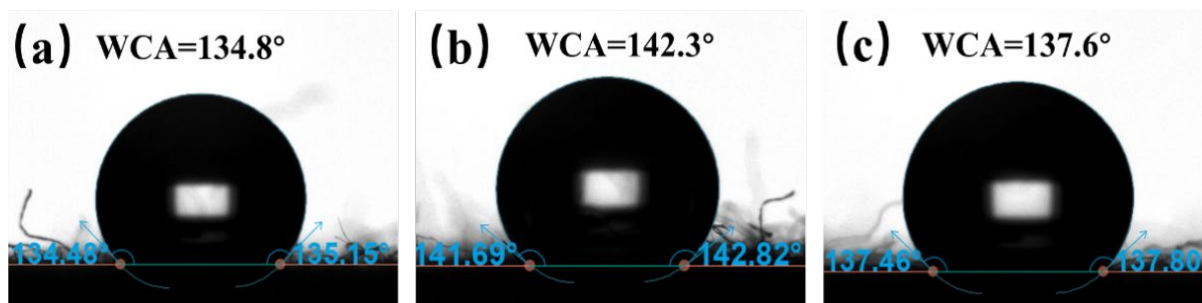

**Figure S4.** The effect of 20 nm (a), 100 nm (b) and 1 μm (c) silica on WCA of cotton fabric.

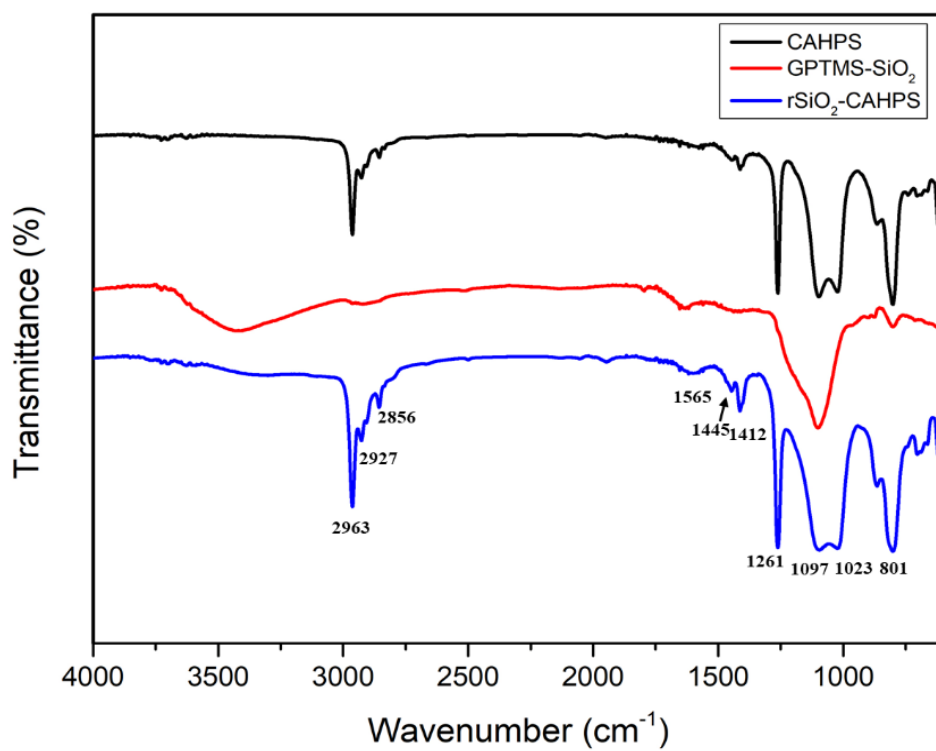

**Figure S5.** FT-IR spectra of CAHPS, GPTMS-SiO<sub>2</sub> and rSiO<sub>2</sub>-CAHPS.

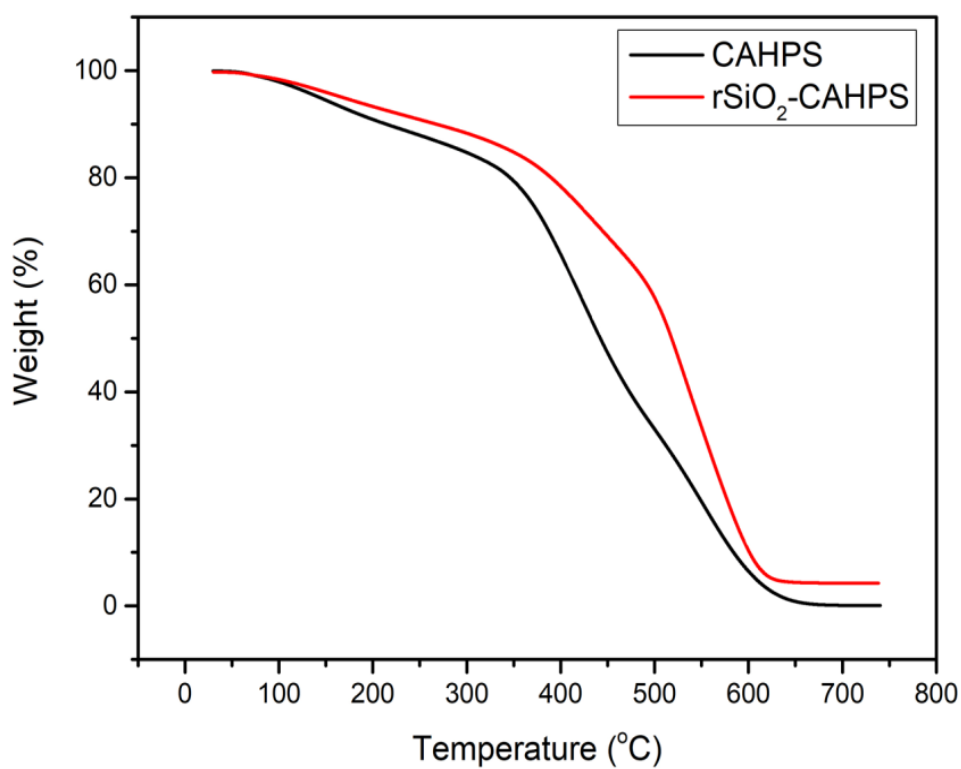

**Figure S6.** TGA curves of CAHPS and rSiO<sub>2</sub>-CAHPS.
